# Supplementary material
Source: PubMed Central journal article supplement (PMC6686777)
Supplement: jamasurg-154-1-s001.pdf [file jamasurg-154-1-s001.pdf]

## Supplementary Online Content

Altieri MS, Salles A, Bevilacqua LA, et al. Perceptions of surgery residents about parental leave during training. *JAMA Surg*. Published online August 7, 2019. doi:10.1001/jamasurg.2019.2985

### **eAppendix.** Survey flow

This supplementary material has been provided by the authors to give readers additional information about their work.

# eAppendix: Survey Flow

Block: Default Question Block (37 Questions)

Page Break

---

---

Start of Block: Default Question Block

Dear Surgery Resident:

It is important to examine the perceptions of residents regarding parental leave and knowledge of the current parental leave policy. Please complete this research survey that should not take more than 10 minutes of your time.

There are no foreseeable risks or benefits for participating in this study. No IP addresses or email addresses will be provided to use by the APDS.

There are no costs involved for participating in this study. Participation is completely voluntary. If you have any questions, concerns, or complaints about this study, you may contact me at [maltieri@wustl.edu](mailto:maltieri@wustl.edu).

Thank you for your participation.

Maria Altieri MD MS, Arghavan Salles MD PhD, Michael Brunt MD, John Mellinger MD, Jessica Gooch MD, and Aurora Pryor MD

---

How would you describe yourself?

- Medical Student (2)
- General Surgery Resident (3)
- Resident in Surgical Subspecialty (Urology, Orthopedics, OMFS, Plastic Surgery, Cardiothoracic Surgery, ENT, Vascular Surgery, Neurosurgery) (8)
- Fellow (4)
- Practicing Surgeon (5)
- Other (6) \_\_\_\_\_

*Skip To: End of Survey If How would you describe yourself? = Medical Student*  
*Skip To: End of Survey If How would you describe yourself? = Practicing Surgeon*  
*Skip To: End of Survey If How would you describe yourself? = Fellow*  
*Skip To: End of Survey If How would you describe yourself? = Other*  
*Skip To: End of Survey If How would you describe yourself? (Other) Is Not Empty*

*Display This Question:*

*If How would you describe yourself? = General Surgery Resident*  
*Or How would you describe yourself? = Resident in Surgical Subspecialty (Urology, Orthopedics, OMFS, Plastic Surgery, Cardiothoracic Surgery, ENT, Vascular Surgery, Neurosurgery)*

What is your sex?

- Male (1)
- Female (2)

Are you of Hispanic, Latino, or Spanish origin?

- Yes (1)
- No (2)

How would you describe yourself?

- White (1)
  - Black or African American (2)
  - American Indian or Alaska Native (3)
  - Asian (4)
  - Native Hawaiian or Pacific Islander (5)
  - Other (6) \_\_\_\_\_
- 

What is your age?

▼ 23 (1) ... 71 (49)

---

What is your current clinical level of training?

- PGY 1 (1)
  - PGY 2 (2)
  - PGY 3 (3)
  - PGY 4 (4)
  - PGY 5 (5)
  - Research/Professional development (6)
-

What region is your residency in?

- Northeast (Maine, Massachusetts, Rhode Island, Connecticut, New Hampshire, Vermont, New York, Pennsylvania, New Jersey, Delaware, Maryland) (1)
  - Southeast (West Virginia, Virginia, Kentucky, Tennessee, North Carolina, South Carolina, Georgia, Alabama, Mississippi, Arkansas, Louisiana, Florida) (2)
  - Southwest (Texas, Oklahoma, New Mexico, Arizona) (3)
  - Midwest (Ohio, Indiana, Michigan, Illinois, Missouri, Wisconsin, Minnesota, Iowa, Kansas, Nebraska, South Dakota, North Dakota) (4)
  - West (Colorado, Wyoming, Montana, Idaho, Washington, Oregon, Utah, Nevada, California, Alaska, Hawaii) (5)
- 

How did you access this survey?

- Through an email from my program director (1)
  - Through an email from the Association of Women Surgeons (3)
  - Through an email from another source (2)
  - Through Twitter (4)
  - Through SMG (5)
  - Other (6)
- 

Which best describes your current relationship status?

- Married or Domestic Partnership (1)
  - Divorced/Separated/Widowed (2)
  - Never Married/Single (3)
-

*Display This Question:*

*If Which best describes your current relationship status? = Married or Domestic Partnership*

Which best describes the employment status of your spouse/partner?

- Full-time employed (40 or more hours per week) (1)
- Part-time employed (up to 39 hours per week) (2)
- Unemployed (3)
- Student (4)
- Retired (5)
- Homemaker (6)
- Self-employed (7)
- Unable to work (8)
- Other (9) \_\_\_\_\_

*Display This Question:*

*If Which best describes your current relationship status? = Married or Domestic Partnership*

Which best describes your spouse/partner's occupation?

- Non-physician (1)
- Practicing Physician (non-surgeon) (2)
- Practicing Surgeon (3)
- Resident (4)
- Other (5) \_\_\_\_\_

Do you have biological children?

- Yes (1)
  - No (2)
  - Currently expecting (3)
- 

*Display This Question:*

*If Do you have biological children? != No*

Did you have/are you having children during clinical years of residency?

- Yes (1)
  - No (2)
- 

Are you considering having future biological children during clinical years of residency?

- Yes (1)
  - Maybe (2)
  - No (3)
-



When is the best time for female surgeons to have children?

- Prior to residency (1)
  - During residency (clinical years) (2)
  - During research time (3)
  - Fellowship (4)
  - After completion of residency/fellowship training (5)
- 

When is the best time for male surgeons to have children?

- Prior to residency (1)
  - During residency (clinical years) (2)
  - During research time (3)
  - Fellowship (4)
  - After completion of residency/fellowship training (5)
- 

Have you taken parental leave during clinical years of residency?

- Yes (1)
  - No (2)
  - Not applicable (3)
- 

*Display This Question:*

*If Have you taken parental leave during clinical years of residency? = Yes*

How long was your average parental leave (per child) during your clinical years of residency?

- None (1)
- <2 weeks (2)
- 2-4 weeks (3)
- 4-6 weeks (4)
- >6 weeks (5)

---

*Display This Question:*

*If Have you taken parental leave during clinical years of residency? = Yes*

To what extent did you feel supported by other residents at your program when you took parental leave?

- Not at all (1)
- Slightly (2)
- Somewhat (3)
- Moderately (4)
- Extremely (5)

---

*Display This Question:*

*If Have you taken parental leave during clinical years of residency? = Yes*

To what extent did you feel supported by the faculty at your program when you took parental leave?

- Not at all (1)
- Slightly (2)
- Somewhat (3)
- Moderately (4)
- Extremely (5)

---

*Display This Question:*

*If Have you taken parental leave during clinical years of residency? = Yes*

What would make you feel more supported in taking parental leave? Are there specific things faculty, residents, or others around you could do?

---

---

Do you know the current leave policy for leave under the American Board of Surgery (ABS) guidelines?

- Yes (1)
- No (2)
- Not sure (3)

---

*Display This Question:*

*If Do you know the current leave policy for leave under the American Board of Surgery (ABS) guideli... = Yes*

Other than exceptional arrangements, what is the current leave policy under the ABS guidelines?

- There is no leave policy (1)
  - 16 weeks off during the first three years and 10 weeks during the last 2 years. (2)
  - 14 weeks off during the first three years and 10 weeks during the last 2 years. (3)
  - 10 weeks off during the first three years and 8 weeks during the last 2 years. (4)
  - 8 weeks off during the first two years and 10 weeks during the last 3 years. (5)
  - 10 weeks off during the first two years and 10 weeks during the last 3 years. (6)
- 

How much time per pregnancy do you think female surgical residents should get for maternity leave?

- None (1)
  - <2 weeks (2)
  - 2-4 weeks (3)
  - 4-6 weeks (4)
  - >6 weeks (5)
  - Unsure (6)
-

How much time per pregnancy do you think male surgical residents should get for paternity leave?

- None (1)
  - <2 weeks (2)
  - 2-4 weeks (3)
  - 4-6 weeks (4)
  - >6 weeks (5)
  - Unsure (6)
- 

Have any of your co-residents taken parental leave during clinical residency?

- Yes (1)
  - No (2)
  - Unsure (3)
- 

Do you feel that time off for maternity leave puts an unreasonable strain on other residents in the surgical program?

- Yes (1)
  - No (2)
  - Unsure (3)
-

Please explain why you think this does or does not place an unreasonable strain on other residents.

---

Do you feel that time off for paternity leave puts an unreasonable strain on other residents in the surgical program?

- Yes (1)
- No (2)
- Unsure (3)

Please explain why you think this does or does not place an unreasonable strain on other residents.

---

*Display This Question:*

*If Did you have/are you having children during clinical years of residency? = Yes*

What have been your biggest concerns regarding having a child during residency? Please choose all that apply.

- Don't have a partner (1)
- Financial (2)
- Parental leave policy (3)
- Vigorous training/lack of time (4)
- Childcare concerns (e.g., cost/daycare hours or au pair hours not being long enough for work hours) (5)
- Perceived or actual lack of support from faculty/peers (6)
- Concerns related to breast feeding (e.g., lack of breast feeding facilities/time for breast feeding) (7)
- Lack of role models/previous residents who have children (8)
- Fertility (9)
- Lack of desire for children (10)
- Other (11) \_\_\_\_\_

---

*Display This Question:*

*If Did you have/are you having children during clinical years of residency? = No*

What would be your biggest concerns about having a child during residency? Please choose all that apply.

- Don't have a partner (1)
  - Financial (2)
  - Parental leave policy (3)
  - Vigorous training/lack of time (4)
  - Childcare concerns (e.g., cost/daycare hours or au pair hours not being long enough for work hours) (5)
  - Perceived or actual lack of support from faculty/peers (6)
  - Concerns related to breast feeding (e.g., lack of breast feeding facilities/time for breast feeding) (7)
  - Lack of role models/previous residents who have children (8)
  - Fertility (9)
  - Lack of desire for children (10)
  - Other (11) \_\_\_\_\_
- 

This is a complex issue, and we would appreciate any further comments and explanations you might have about obstacles to having children during residency.

---

---

---

---

---



---

Page Break

---

*Display This Question:*

*If Have you taken parental leave during clinical years of residency? = Yes*

What were the biggest obstacles when you took parental leave during residency? Please choose all that apply.

- Strain on the residency program (8)
- Loss of education/training time (9)
- Perceived or actual lack of support from faculty/peers (10)
- Lack of universal leave policies across all ACGME specialties (11)
- Lack of flexibility of programs (12)
- Financial burden for taking parental leave (13)
- Other (14) \_\_\_\_\_

---

*Display This Question:*

*If Have you taken parental leave during clinical years of residency? = No*

*Or Have you taken parental leave during clinical years of residency? = Not applicable*

What would be the biggest obstacles for you taking parental leave during residency? Please choose all that apply.

- Strain on the residency program (8)
  - Loss of education/training time (9)
  - Perceived or actual lack of support from faculty/peers (10)
  - Lack of universal leave policies across all ACGME specialties (11)
  - Lack of flexibility of programs (12)
  - Financial burden for taking parental leave (13)
  - Other (14) \_\_\_\_\_
- 

Is there anything else you think the researchers should know?

\_\_\_\_\_

End of Block: Default Question Block

---
